# Supplementary material
Source: PubMed Central journal article supplement (PMC5429328)
Supplement: BPH-174-1484-s001.pdf [file BPH-174-1484-s001.pdf]

## Supporting Information

**Real-time PCR.** The primer sequences for target gene *Ffar2*, *Hdac9*, *Il10*, *Il6*, *Tgfb*, *Tnf*, *Ocln* and *Tjp1* were purchased by Eurofins MWG Operon (Huntsville, AL, USA) and are reported in **Supplemental Tab.1**. For Annexin A1 (*Anxa1*), *Ccl2*, *Fpr1*, *Fpr2*, *Gapdh*, and *Ly6g* we used QuantiTect<sup>®</sup> Primer Assays for SYBR Green by Qiagen (Manchester, UK).

The PCR conditions were 15 min at 95°C followed by 40 cycles of three-step PCR denaturation at 94°C for 15 s, annealing at 60°C for 30 s and extension at 72°C for 30 s. Each sample contained 40-100 ng cDNA in 2X Power SYBRGreen PCR Master Mix (Applied Biosystem) and 200 nmol/L of each primer in a final volume of 25 µL. The relative amount of each studied mRNA was normalized to *Gapdh* as housekeeping gene, and the data were analyzed according to the 2- $\Delta\Delta$ CT method.

**Supplemental Table 1.** Real-time PCR primer sequences

| Target gene    | Forward primer (5'→3')    | Reverse primer (3'→5')   | Accession Number |
|----------------|---------------------------|--------------------------|------------------|
| <i>Ffar2</i>   | TTCTTACTGGGCTCCCTGCC      | TACCAGCGGAAGTTGGATGC     | NM_146187        |
| <i>Hdac9</i>   | GCGGTCCAGGTTAAAACAGAA     | GCCACCTCAAACACTCGCTT     | NM_001271386.1   |
| <i>Il10</i>    | GGTTGCCAAGCCTTATCGGA      | ACCTGCTCCACTGCCTTGCT     | NM_010548.2      |
| <i>Il6</i>     | ACAAGTGGGAGGCTTAATTACACAT | TTGCCATTGCACAACCTCTTTTC  | NM_031168.1      |
| <i>Ocln</i>    | ATGTCCGGCCGATGCTCTCTC     | CTTTGGCTGCTCTTGGGTCTGTAT | NM_008756.2      |
| <i>Pparg</i>   | CTGCTCAAGTATGGTGTCCATGA   | ATGAGGACTCCATCTTTATTCA   | NM_001127330.1   |
| <i>Slc16a1</i> | GAGCGCGCGAAGCTGCATTTGCT   | TGCTCCCAGGCCCGCTTTACA    | NM_009196.3      |
| <i>Tgfb</i>    | GAAGCCATCCGTGGCCAGAT      | TGACGTCAAAAGACAGCCACT    | NM_021578.2      |
| <i>Tnf</i>     | CATCTTCTCAAACTCGAGTGACAA  | TGGGAGTAGATAAGGTACAGCCC  | NM_012675.3      |
| <i>Tjp1</i>    | ACCCGAAACTGATGCTGTGGATAGA | AAATGGCCGGGCAGAACTTGTGTA | NM_001163574.1   |

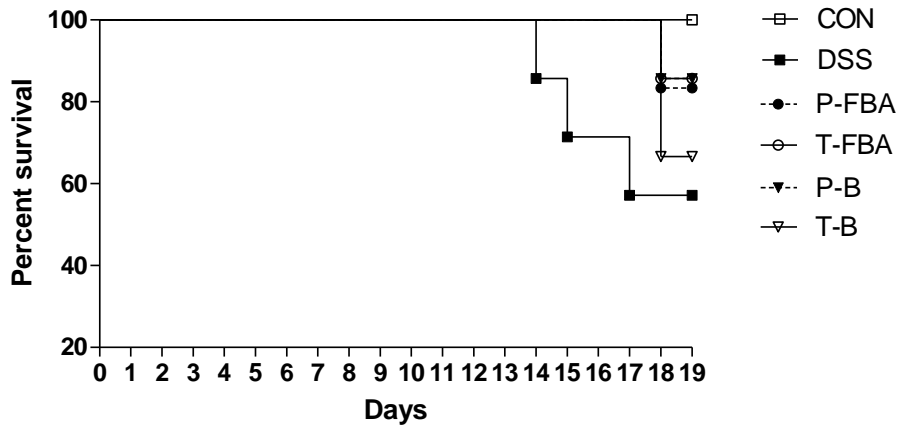

**Supplemental Figure 1. Preventive and therapeutic treatments with FBA increase survival rate in DSS-fed mice.** Data are presented as percent survival rate  $\pm$  SEMs,  $n=10$ . CON, control group; DSS, dextran sodium sulphate group; P-B, DSS-fed mice receiving preventive butyrate treatment; P-FBA, DSS-fed mice receiving preventive FBA treatment; T-B, DSS-fed mice receiving sodium butyrate as therapeutic treatment; T-FBA, DSS-fed mice receiving therapeutic FBA treatment. As depicted, in DSS group the survival rate at day 19 reached 57.1% compared to 100% shown in CON group. Both FBA-based treatments displayed a comparable efficacy to P-B at the end of the experimental protocol, with a mean survival time of 18 d. The same effect was not observed in DSS-fed mice treated with sodium butyrate as therapeutic protocol.

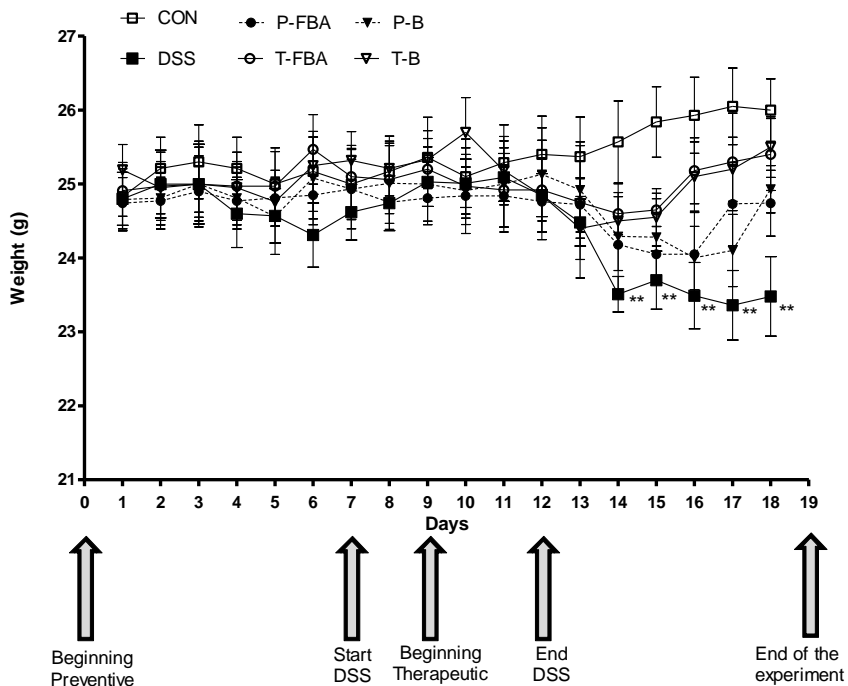

**Supplemental Figure 2. Modification of body weight in CON and DSS mice that were untreated or administered FBA and butyrate as preventive or therapeutic protocol.** Data are means  $\pm$  SEMs,  $n=8$  (\*\* $P<0.01$  Vs CON). DSS, dextran sodium sulphate group; P-B, DSS-fed mice receiving preventive butyrate treatment; P-FBA, DSS-fed mice receiving preventive FBA

treatment; T-B, DSS-fed mice receiving sodium butyrate as therapeutic treatment; T-FBA, DSS-fed mice receiving therapeutic FBA treatment.

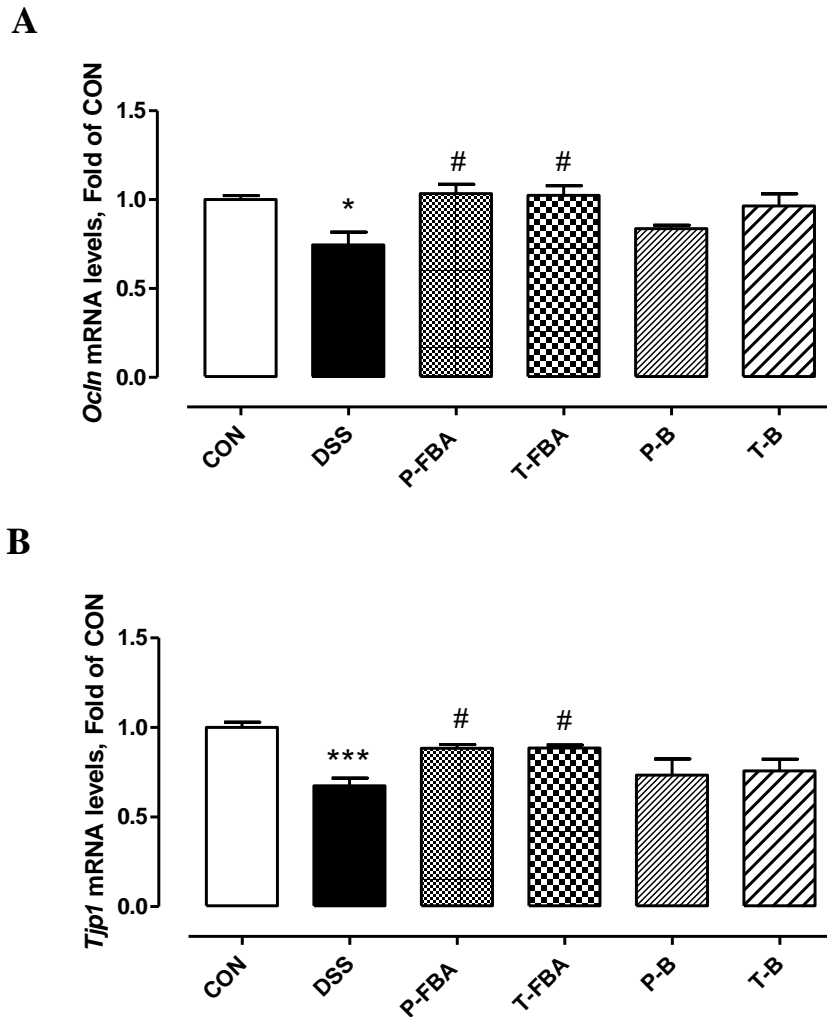

**Supplemental Figure 3. FBA limits the impairment of tight- junction transcriptional levels in colonic mucosa.** Transcriptional levels of *Ocln* (which encode for occludin) and *Tjp1* (tight junction protein 1, gene encoding for ZO-1) were assessed in colon tissue. As shown, DSS challenge significantly reduced the mRNA levels of *Ocln* and *Tjp1* compared to those revealed in control animals. Among treatments, preventive and therapeutic FBA were more effective than butyrate schemes in limiting tight-junctions impairment.

Data are presented as means  $\pm$  SEMs,  $n=8$  (\* $P<0.05$  and \*\*\* $P<0.01$  Vs CON; # $P<0.05$  Vs DSS). CON, control group; DSS, dextran sodium sulphate group; P-B, DSS-fed mice receiving preventive butyrate treatment; P-FBA, DSS-fed mice receiving preventive FBA treatment; T-B, DSS-fed mice receiving sodium butyrate as therapeutic treatment; T-FBA, DSS-fed mice receiving therapeutic FBA treatment.
